# Supplementary material for: Green solvents processed all functional layers for efficient perovskite solar cells
Source: Royal Society of Chemistry journal article supplement (doi:10.1039/d3su00146f), 2023-01-01
Supplement: d3su00146f1.pdf [file d3su00146f1.pdf]

## Supporting Information

# Green solvents processed all function layers for efficient perovskite solar cells

Xiaobing Cao<sup>a\*</sup>, Lei Hao<sup>a</sup>, Gengyang Su<sup>a</sup>, Xiaoxi Li<sup>a</sup>, Tuyu Dong<sup>a</sup>, Pengjie Chao<sup>a</sup>, Daize Mo<sup>a</sup>,  
Qingguang Zeng<sup>a</sup>, Xin He<sup>a\*</sup>, Jinquan Wei<sup>b\*</sup>

1. School of Applied Physics and Materials, Wuyi University, Jiangmen, Guangdong 529020,  
P.R. China
2. State Key Lab of New Ceramics and Fine Processing; Education Ministry Key Laboratory  
for Advanced Materials Processing Technology; School of Materials Science and  
Engineering, Tsinghua University, Beijing, China, 100084

\*Corresponding Authors. E-mail: [caoxb14@tsinghua.org.cn](mailto:caoxb14@tsinghua.org.cn); [hexinwyu@126.com](mailto:hexinwyu@126.com);  
[jqwei@tsinghua.edu.cn](mailto:jqwei@tsinghua.edu.cn). Tel: +86-10-62781065.

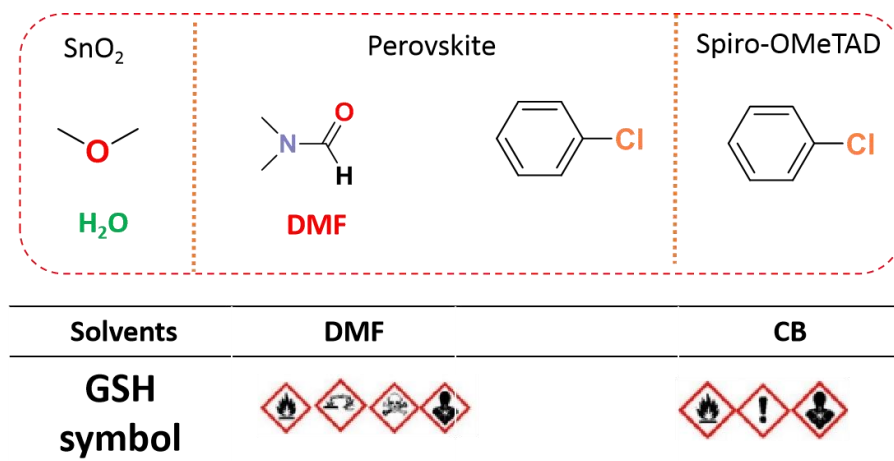

**Figure S1** The molecular structure and GHS symbol of solvents used for preparation of various functional layers in PSCs in the traditional solvent engineering approach.

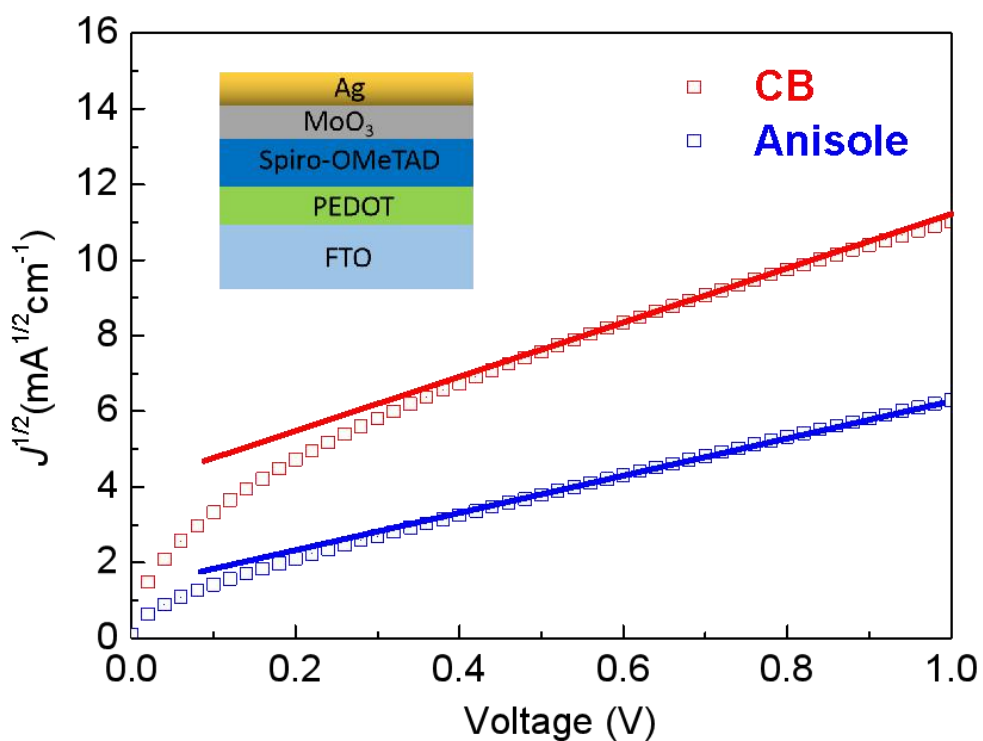

**Figure S2**  $J^{1/2} \sim V$  characteristics for SCLC hole-only mobility. Inset is the device configuration of hole-only device.

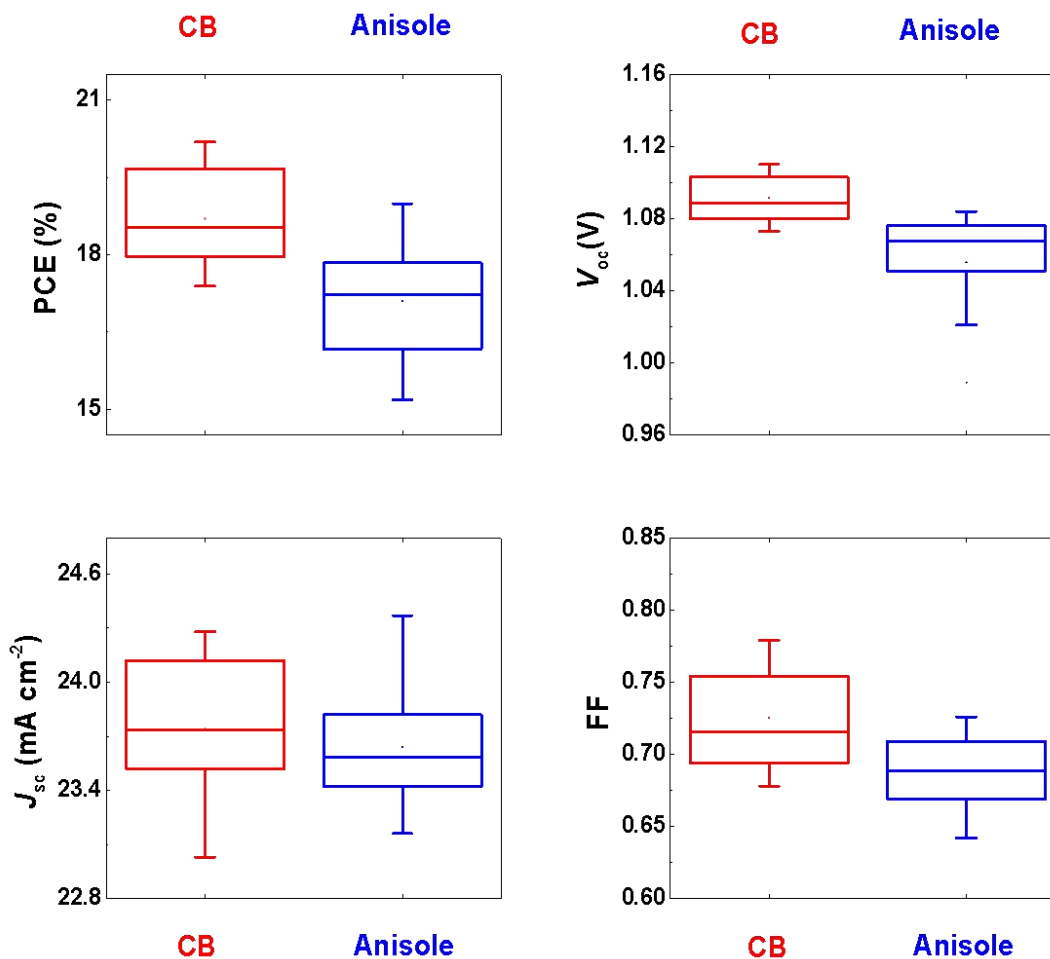

**Figure S3** The boxchart of photovoltaic parameters of solar cells prepared from different solvent for preparation of Spiro-OMeTAD films.

**Table S1** The fitting results of TRPL spectra.

| Samples                               | $\tau_1$ (ns) | $\tau_2$ (ns) | $A_1$ (%) | $A_2$ (%) | $\tau_{ave}$ (ns) |
|---------------------------------------|---------------|---------------|-----------|-----------|-------------------|
| FTO/perovskite                        | 48.52         | 315.86        | 8.09      | 91.91     | 312.29            |
| FTO/perovskite/Spiro-OMeTAD (CB)      | 27.24         | 176.99        | 48.29     | 51.71     | 158.17            |
| FTO/perovskite/Spiro-OMeTAD (Anisole) | 38.91         | 258.37        | 48.35     | 51.65     | 231.25            |

$$\tau_{ave} = (A_1\tau_1^2 + A_2\tau_2^2)/(A_1\tau_1 + A_2\tau_2)$$
